# Supplementary material for: Ras-related C3 botulinum toxin substrate 1 (RAC1) regulates glucose-stimulated insulin secretion via modulation of F-actin
Source: Springer Nature journal article supplement (doi:10.1007/s00125-013-2849-5), 2013-02-14
Supplement: MOESM1 [file 8091448]

ESM Table 1: Primers used in this study

|                 | Sense                       | Antisense                     |
|-----------------|-----------------------------|-------------------------------|
| rat <i>Rac1</i> | 5'-GTAAACCTGCCTGCTCATC-3'   | 5'-GAGGCCCCCGACCAGACCCTAC-3'  |
| rat <i>Rac2</i> | 5'-GCTTCGTCAAACACTGTCTTG-3' | 5'-TGGCTACCATCTGGATAGCCCGT-3' |
